# Supplementary material for: The Endangered Sardinian Grass Snake: Distribution Update, Bioclimatic Niche Modelling, Dorsal Pattern Characterisation, and Literature Review
Source: MDPI journal article supplement (doi:10.3390/life13091867), 2023-09-04
Supplement: s1 [file s1]

# **The Endangered Sardinian Grass Snake: Distribution Update, Bioclimatic Niche Modelling, Dorsal Pattern Characterisation, and Literature Review**

Matteo Riccardo Di Nicola<sup>1,2,3,\*</sup>, Andrea Vittorio Pozzi<sup>4</sup>, Sergio Mezzadri<sup>5</sup>, Francesco Paolo Faraone<sup>6</sup>, Giorgio Russo<sup>7</sup>, Jean Lou M. C. Dorne<sup>8</sup> and Gianmarco Minuti<sup>9</sup>

<sup>1</sup> Faculty of Veterinary Medicine, Department of Pathobiology, Pharmacology and Zoological Medicine, Wildlife Health Ghent, Ghent University, 9820 Merelbeke, Belgium

<sup>2</sup> Unit of Dermatology and Cosmetology, IRCCS San Raffaele Hospital, Via Olgettina 60, 20132 Milan, Italy

<sup>3</sup> Asociación Herpetológica Española, Apartado de correos 191, 28911 Leganés, Spain

<sup>4</sup> Molecular Ecology and Evolution Group, School of Natural Sciences, Bangor University, Bangor LL57 2UW, UK

<sup>5</sup> Independent Researcher, Via Palmerio, 29121 Piacenza, Italy

<sup>6</sup> Dipartimento Scienze e Tecnologie Biologiche, Chimiche e Farmaceutiche, University of Palermo, Via Archirafi 18, 90123 Palermo, Italy

<sup>7</sup> VIB-VUB Center for Structural Biology, Vrije Universiteit Brussel, 1090 Brussels, Belgium

<sup>8</sup> Methodology and Scientific Support Unit, European Food Safety Authority (EFSA), Via Carlo Magno 1A, Parma 43126, Italy

<sup>9</sup> Department of Biology, Ecology & Biodiversity Research Unit, Vrije Universiteit Brussels, 1090Brussels, Belgium

\* Correspondence: [dinicola.matteo@hsr.it](mailto:dinicola.matteo@hsr.it)

## **SUPPLEMENTARY MATERIALS**

| Subspecies                                               | Distribution                                                                  |
|----------------------------------------------------------|-------------------------------------------------------------------------------|
| <i>Natrix astreptophora astreptophora</i> (Seoane, 1884) | Iberian Peninsula and Occitany (France)                                       |
| <i>Natrix astreptophora algerica</i> (Hecht, 1930)       | Mediterranean region of central and eastern Algeria, Tunisia.                 |
| <i>Natrix helvetica helvetica</i> (Lacepède, 1789)       | Western Europe, from the Pyrenees to the Rhine region, Great Britain.         |
| <i>Natrix helvetica sicula</i> (Cuvier, 1829)            | Sicily and mainland Italy, across the Alps to southernmost Bavaria (Germany). |
| <i>Natrix helvetica cetti</i> Gené, 1839                 | Sardinia (Italy)                                                              |
| <i>Natrix helvetica corsa</i> (Hecht, 1930)              | Corsica (France)                                                              |
| <i>Natrix natrix natrix</i> (Linnaeus, 1758)             | Central Europe and Scandinavia                                                |
| <i>Natrix natrix vulgaris</i> Laurenti, 1768             | Southern Central Europe and the northern Balkans                              |
| <i>Natrix natrix moreotica</i> (Bedriaga, 1882)          | Southern Balkans, western Anatolia and Cyprus                                 |
| <i>Natrix natrix scutata</i> (Pallas, 1771)              | From eastern Poland and central Anatolia to Lake Baikal                       |

**Table S1.** Valid *Natrix natrix* complex subspecies and their approximate distribution ranges, according to Fritz and Schmidtler (2020) and Fritz and Ihlow (2022).

| Individual | Year | Protected coordinates | Altitude (m a.s.l.) | Pattern category |
|------------|------|-----------------------|---------------------|------------------|
| 1          | 2004 | 40.***, 9.***         | 537                 | IV               |
| 2          | 2015 | 39.***, 9.***         | 584                 | IV               |
| 3          | 2019 | 39.***, 9.***         | 691                 | II               |
| 4          | 2022 | 39.***, 8.***         | 396                 | I                |
| 5          | 2022 | 39.***, 9.***         | 884                 | II               |
| 6          | 2022 | 39.***, 9.***         | 773                 | IV               |
| 7          | 2022 | 39.***, 9.***         | 784                 | II               |
| 8          | 2016 | 40.***, 9.***         | 798                 | II               |
| 9          | 2011 | 39.***, 8.***         | 417                 | N/A              |
| 10         | 2022 | 40.***, 9.***         | 920                 | III              |
| 11         | 2017 | 39.***, 8.***         | 451                 | I                |
| 12         | 2020 | 40.***, 9.***         | 726                 | I                |
| 13         | 2019 | 39.***, 9.***         | 876                 | N/A              |
| 14         | 2017 | 39.***, 9.***         | 703                 | II               |
| 15         | 2017 | 39.***, 9.***         | 689                 | II               |
| 16         | 2017 | 39.***, 9.***         | 516                 | II               |
| 17         | 2017 | 39.***, 9.***         | 525                 | II               |
| 18         | 2017 | 39.***, 9.***         | 577                 | N/A              |
| 19         | 2021 | 39.***, 9.***         | 727                 | IV               |
| 20         | 2021 | 39.***, 9.***         | 561                 | IV               |
| 21         | 2021 | 39.***, 9.***         | 656                 | II               |
| 22         | 2021 | 39.***, 9.***         | 522                 | IV               |
| 23         | 2022 | 39.***, 8.***         | 530                 | I                |
| 24         | 2018 | 40.***, 9.***         | 1407                | II               |
| 25         | 2008 | 40.***, 9.***         | 642                 | II               |
| 26         | 2008 | 40.***, 9.***         | 927                 | I                |
| 27         | 2009 | 40.***, 9.***         | 649                 | N/A              |
| 28         | 2014 | 40.***, 9.***         | 985                 | II               |
| 29         | 2016 | 40.***, 9.***         | 710                 | II               |
| 30         | 2016 | 40.***, 9.***         | 842                 | N/A              |
| 31         | 2018 | 40.***, 9.***         | 983                 | I                |
| 32         | 2021 | 39.***, 9.***         | 333                 | II               |
| 33         | 2019 | 39.***, 9.***         | 553                 | II               |
| 34         | 2022 | 39.***, 8.***         | 123                 | III              |
| 35         | 2020 | 39.***, 9.***         | 543                 | II               |
| 36         | 2011 | 39.***, 9.***         | 672                 | N/A              |
| 37         | 2011 | 39.***, 9.***         | 693                 | N/A              |
| 38         | 2018 | 39.***, 9.***         | 73                  | II               |
| 39         | 2019 | 39.***, 9.***         | 555                 | II               |
| 40         | 2018 | 39.***, 9.***         | 502                 | I                |
| 41         | 2018 | 39.***, 9.***         | 927                 | III              |
| 42         | 2021 | 39.***, 8.***         | 249                 | I                |
| 43         | 2021 | 40.***, 9.***         | 940                 | I                |
| 44         | 2002 | 40.***, 9.***         | 649                 | III              |
| 45         | 2014 | 40.***, 9.***         | 440                 | II               |
| 46         | 2014 | 40.***, 9.***         | 440                 | N/A              |

|    |      |               |     |     |
|----|------|---------------|-----|-----|
| 47 | 2019 | 40.***, 9.*** | 553 | I   |
| 48 | 2020 | 39.***, 8.*** | 118 | N/A |
| 49 | 2022 | 39.***, 9.*** | 553 | II  |
| 50 | 2013 | N/A           | N/A | II  |
| 51 | 2012 | N/A           | N/A | IV  |
| 52 | 2011 | 39.***, 9.*** | 674 | III |
| 53 | 2018 | 39.***, 9.*** | 569 | II  |
| 54 | 2018 | 39.***, 9.*** | 569 | I   |
| 55 | 2018 | 39.***, 9.*** | 569 | IV  |
| 56 | 2019 | 39.***, 9.*** | 569 | IV  |
| 57 | 2018 | 39.***, 9.*** | 569 | III |
| 58 | 2020 | 40.***, 9.*** | 925 | III |
| 59 | 2018 | 39.***, 8.*** | 34  | II  |
| 60 | 2019 | 40.***, 9.*** | 244 | I   |
| 61 | 2019 | 40.***, 9.*** | 244 | I   |
| 62 | 2018 | 39.***, 9.*** | 343 | II  |
| 63 | 2021 | 40.***, 9.*** | 405 | I   |
| 64 | 2023 | 39.***, 8.*** | 20  | N/A |
| 65 | 2023 | 39.***, 9.*** | 865 | II  |
| 66 | 2019 | 39.***, 8.*** | 55  | II  |

**Table S2.** List of verified observations of *Natrix helvetica cetti* considered in the study.

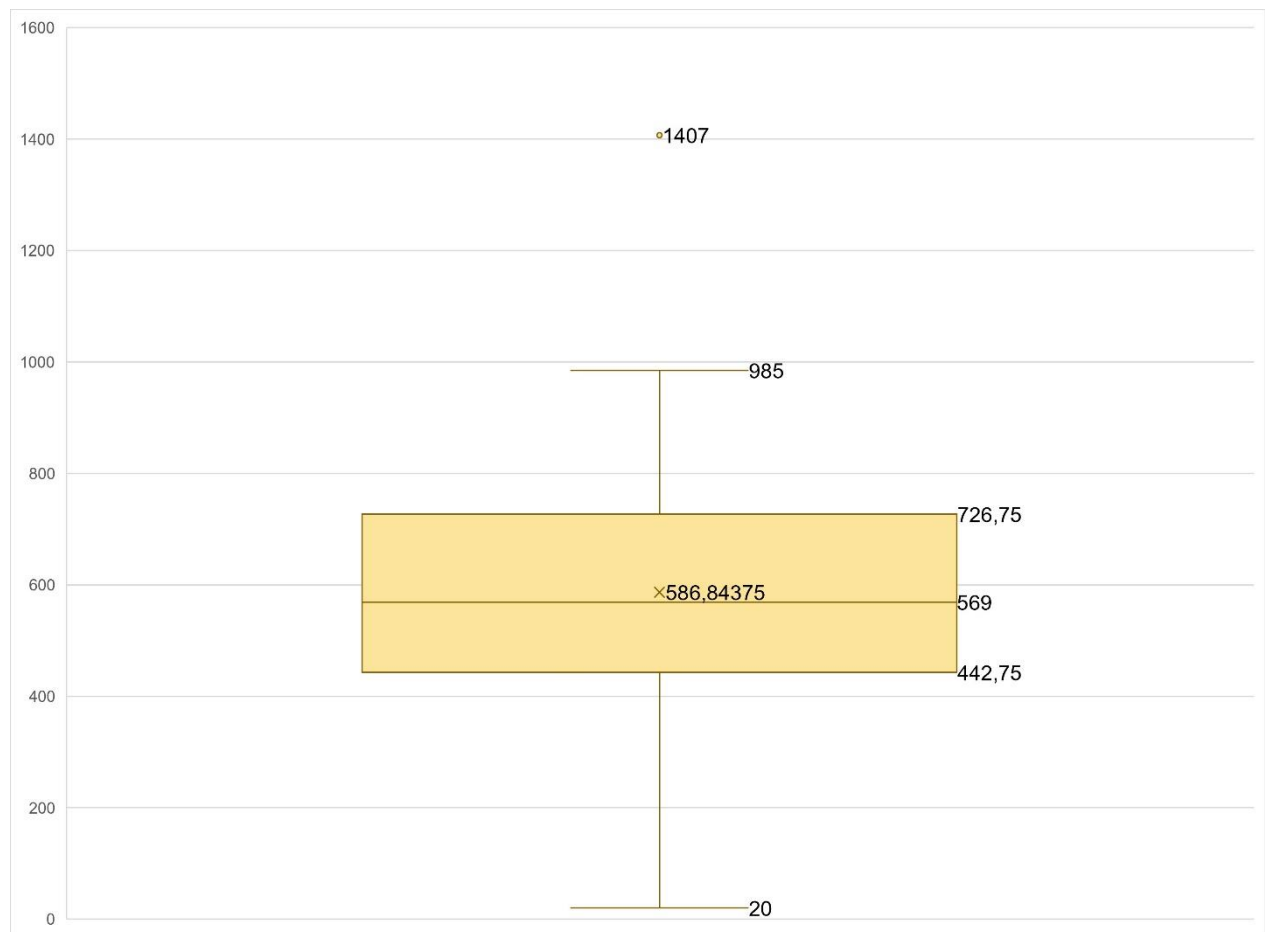

**Figure S1.** Altitudinal plot of the 64 *Natrix helvetica cetti* observations provided with geographic information.

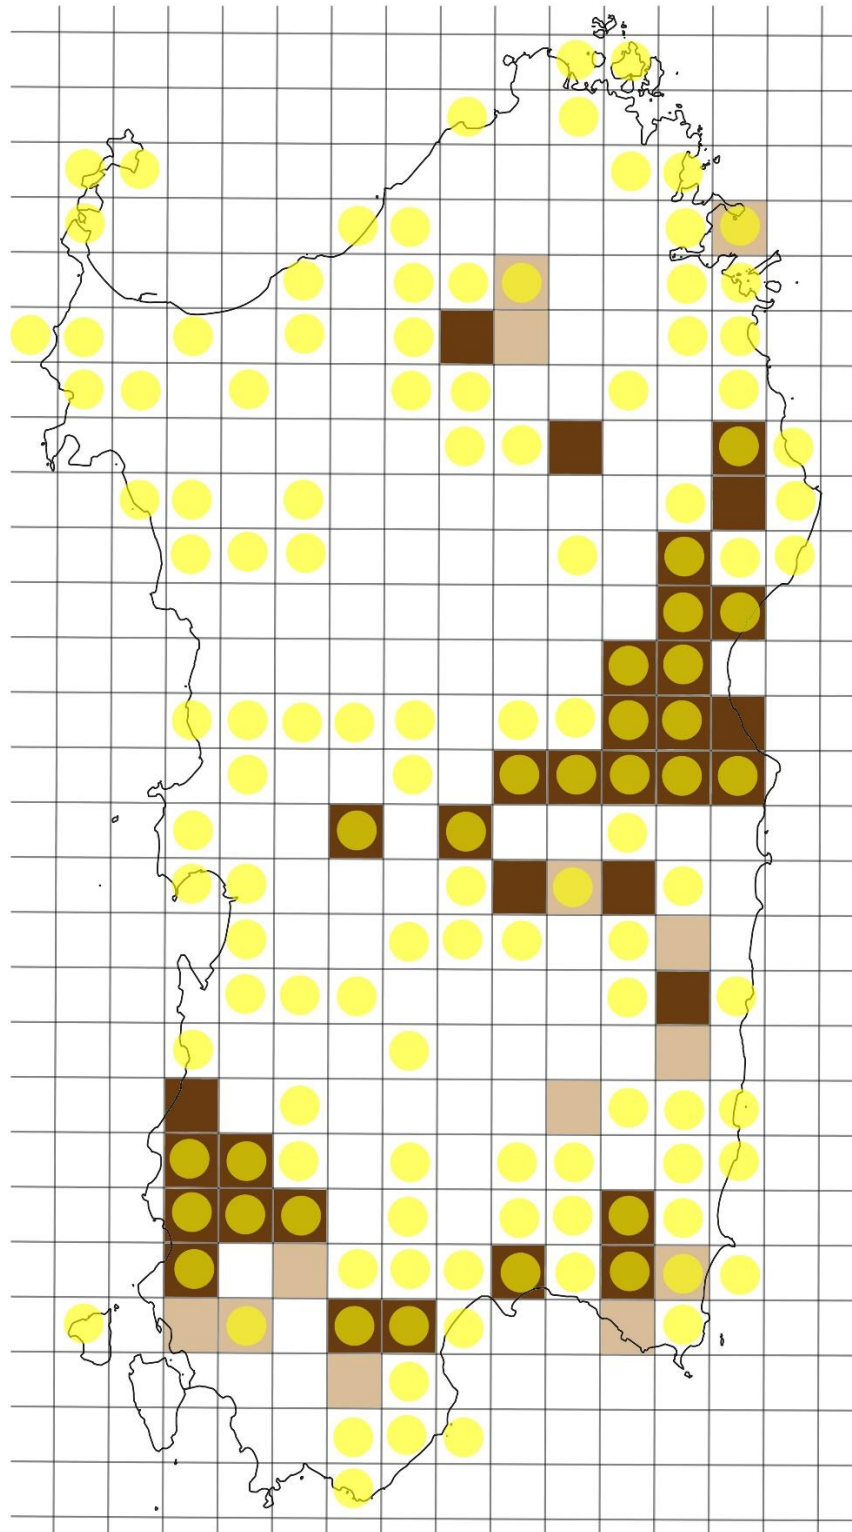

**Figure S2.** 10x10 km UTM map of Sardinia with the distribution of *Natrix helvetica cetti* (brown squares: post-2010 records; beige squares: pre-2010 records) and *N. maura* (yellow circles).

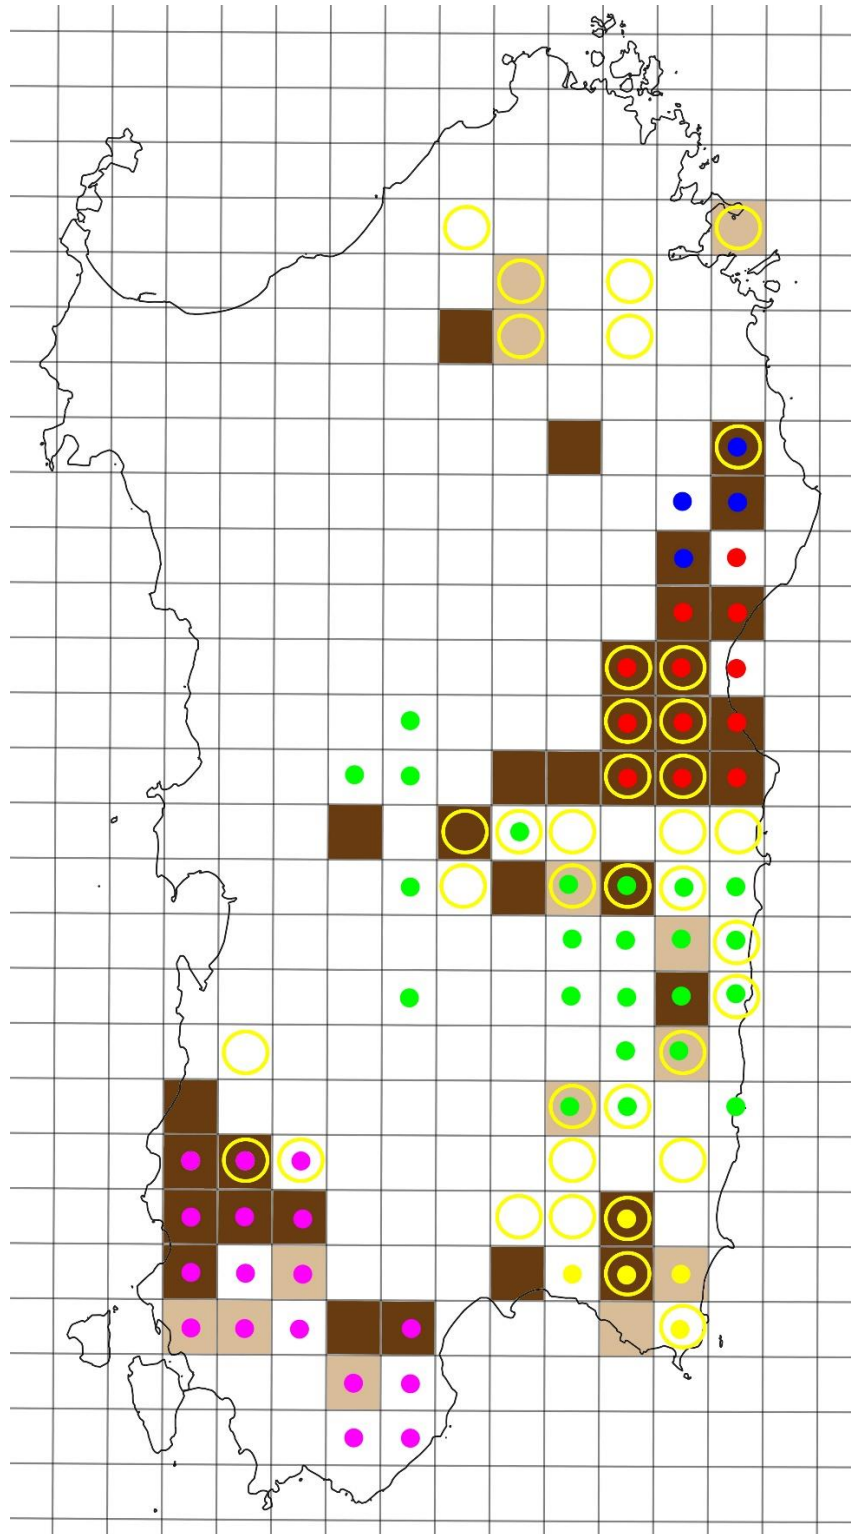

**Figure S3.** 10x10 km UTM map of Sardinia with the distribution of *Natrix helvetica cetti* (brown squares: post-2010 records; beige squares: pre-2010 records) and urodeles (blue dots: *Speleomantes flavus*; red dots: *S. supramontis*; green dots: *S. imperialis*; yellow dots: *S. sarrabusensis*; violet dots: *S. genei*; yellow circles: *Euproctus platycephalus*).

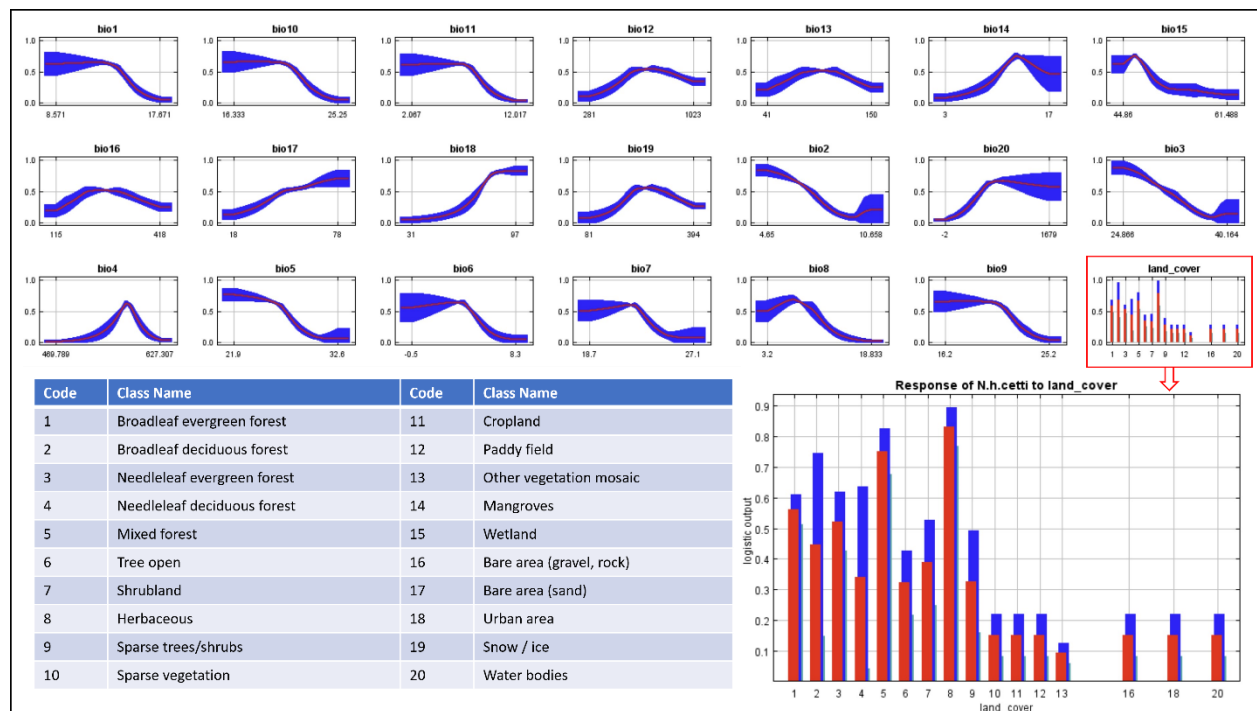

**Figure S4.** Response curves showing the change in bioclimatic suitability for *Natrix helvetica cetti* (y axes) in response to variation in the predictor variables (x axes) used in the models. Similar response curves denote highly correlated variables. Codes are as follows: bio1 = mean annual temperature; bio2 = mean diurnal temperature range; bio3 = isothermality; bio4 = temperature seasonality; bio5 = maximum temperature of the warmest month; bio6 = minimum temperature of the coldest month; bio7 = temperature annual range; bio8 = mean temperature of the wettest quarter; bio9 = mean temperature of the driest quarter; bio10 = mean temperature of the warmest quarter; bio11 = mean temperature of the coldest quarter; bio12 = annual precipitation; bio13 = precipitation of the wettest month; bio14 = precipitation of the driest month; bio15 = precipitation seasonality; bio16 = precipitation of the wettest quarter; bio17 = precipitation of the driest quarter; bio18 = precipitation of the warmest quarter; bio19 = precipitation of the coldest quarter; bio20: altitude (<https://www.worldclim.org/data/bioclim.html>). The inset highlights the response to the variable land cover, with relative legend (<https://globalmaps.github.io/glcnm.html>).



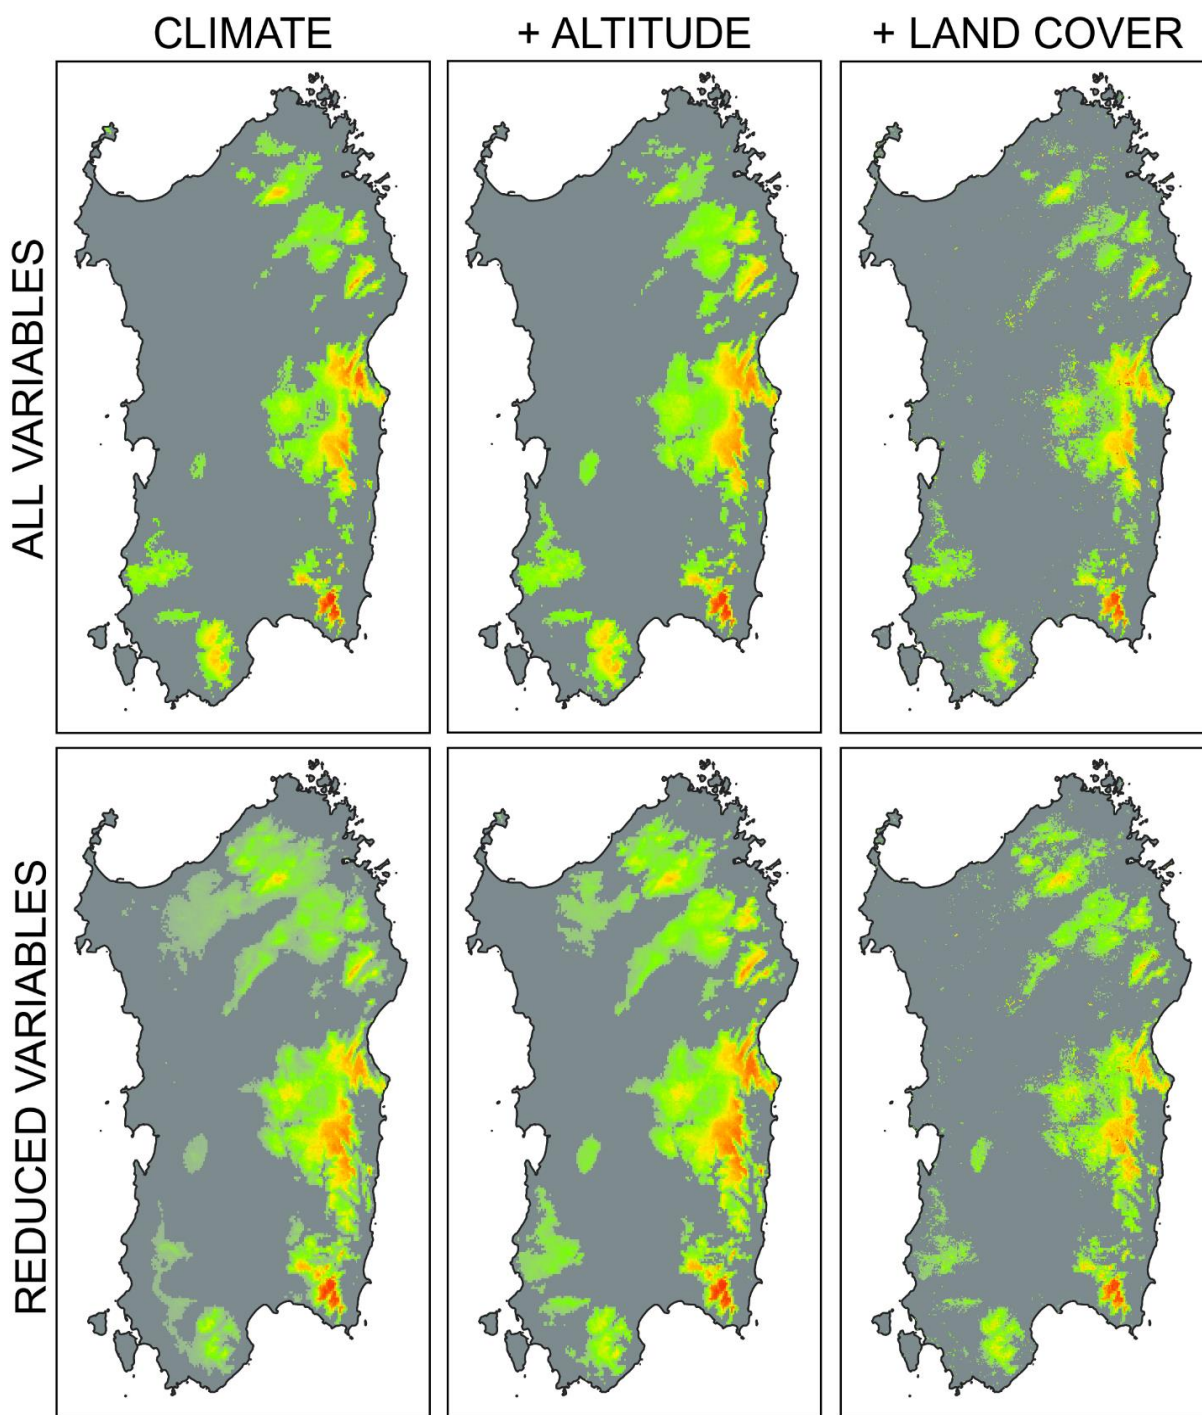

**Figure S5.** Predicted bioclimatic suitability for *Natrix helvetica cetti* in Sardinia based on six model combinations. Models were trained either on all 19 bioclimatic variables obtained from WorldClim 2.1 (Fick & Hijmans, 2017) or on a reduced set of variables selected to minimize multicollinearity between predictors (see section 2.3 for details). Altitude and land cover were subsequently added in a step-wise fashion to observe their effect on model output. Warmer colours indicate higher bioclimatic suitability; grey areas fall below the minimum suitability threshold.

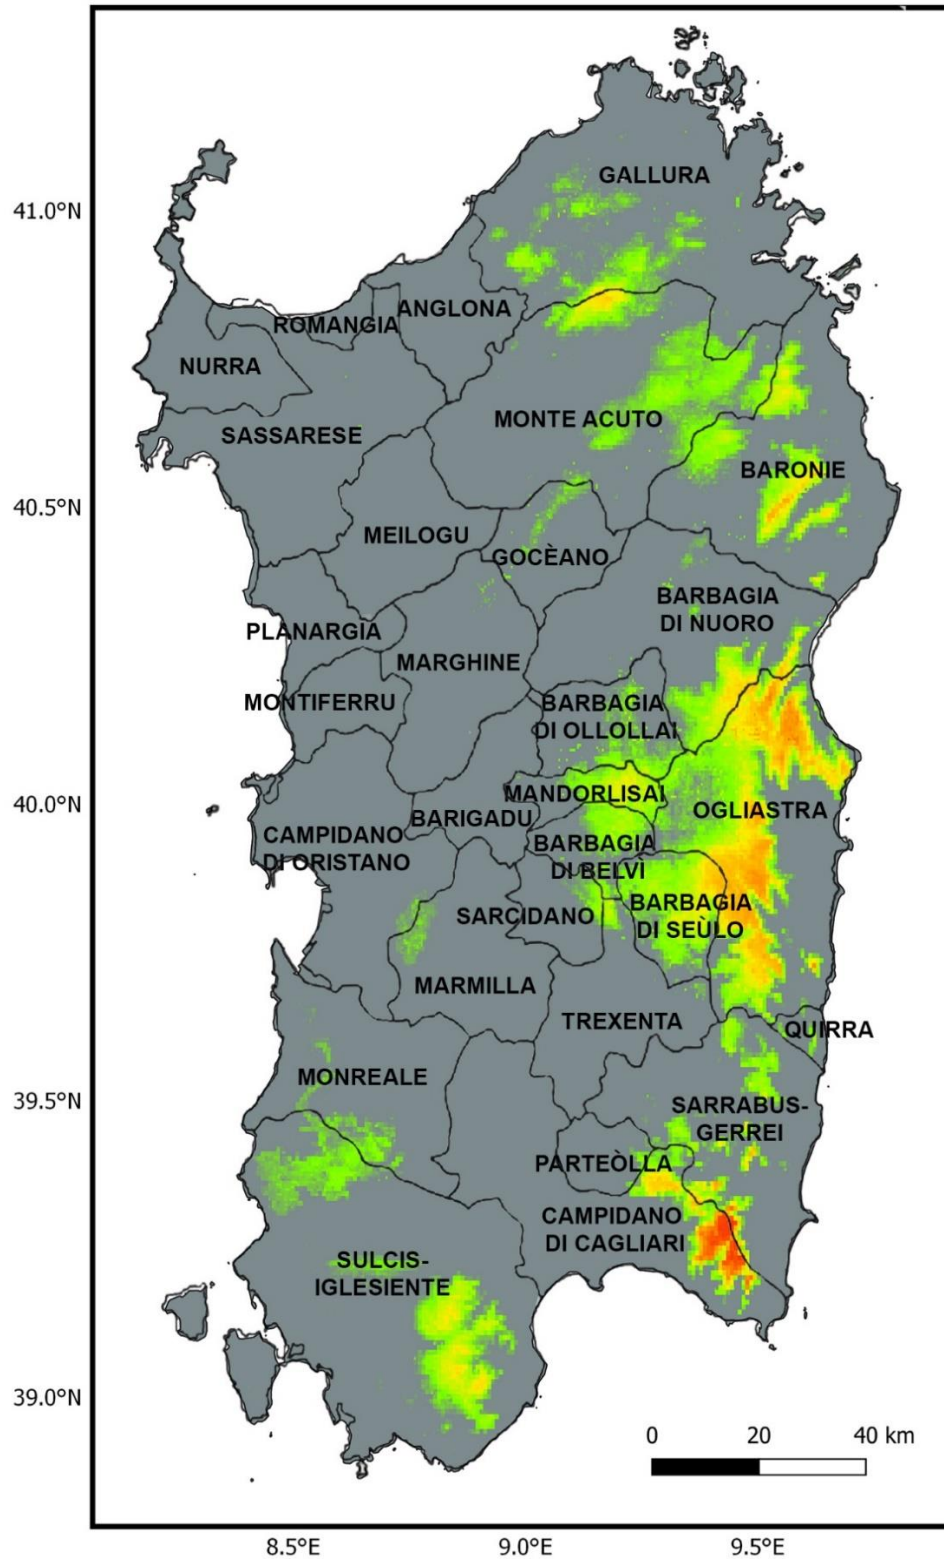

**Figure S6.** Predicted bioclimatic suitability for *Natrix helvetica cetti* in Sardinia (see Figure 3 in the main document) superimposed on the map of Sardinian sub-regions.

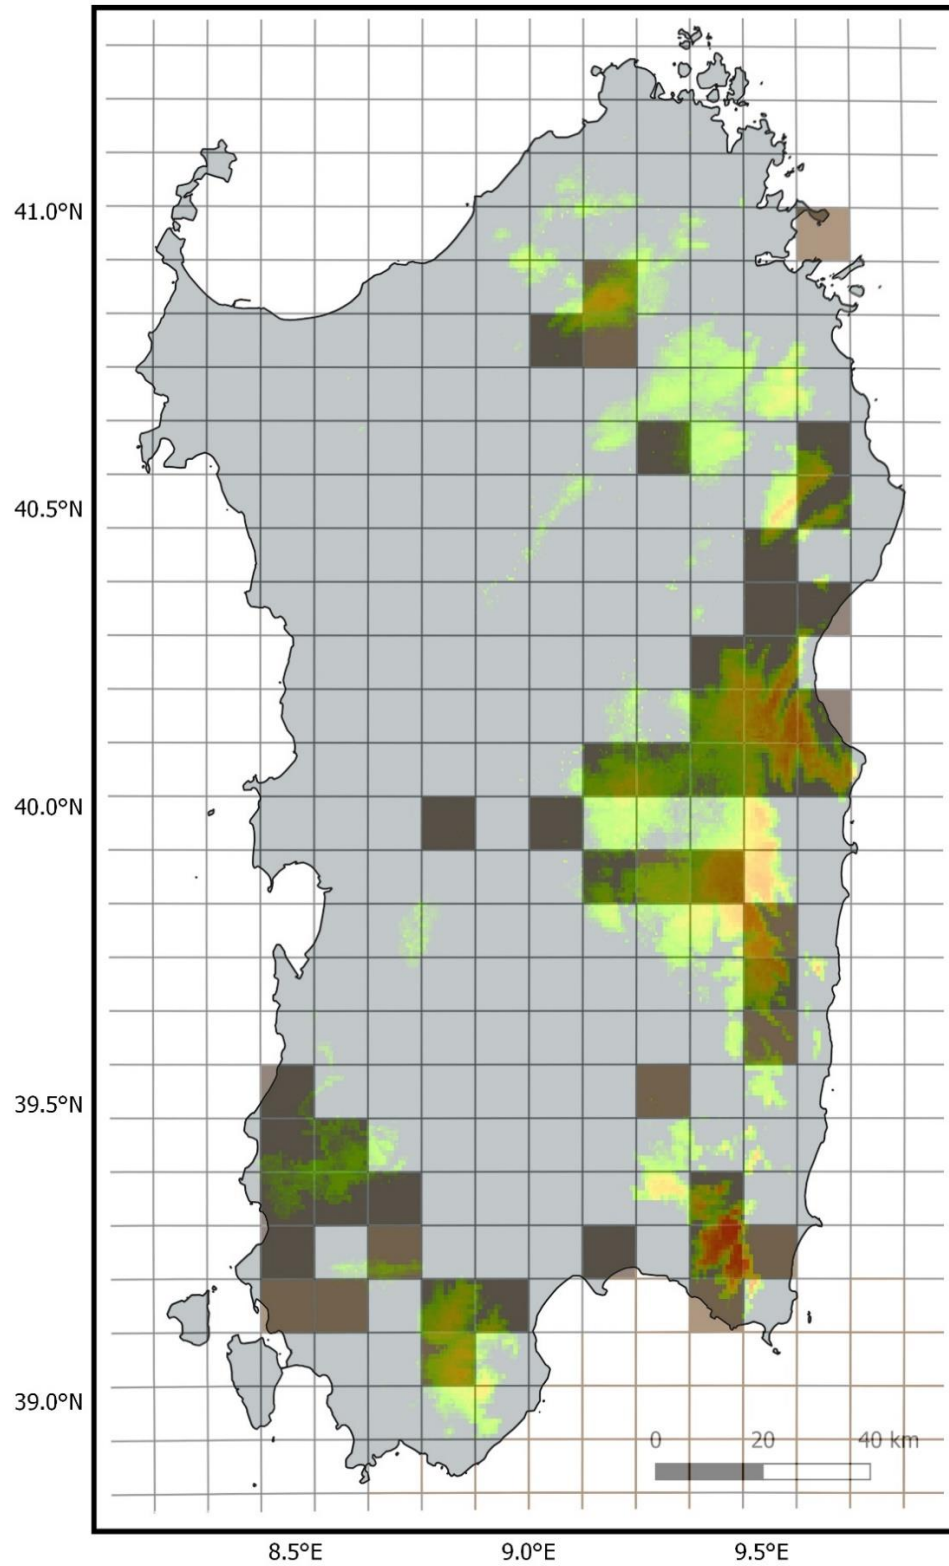

**Figure S7.** Predicted bioclimatic suitability for *Natrix helvetica cetti* in Sardinia (see Figure 3 in the main document) superimposed on the 10x10 km UTM map with the updated distribution of the taxon (see Figure 2A in the main document).

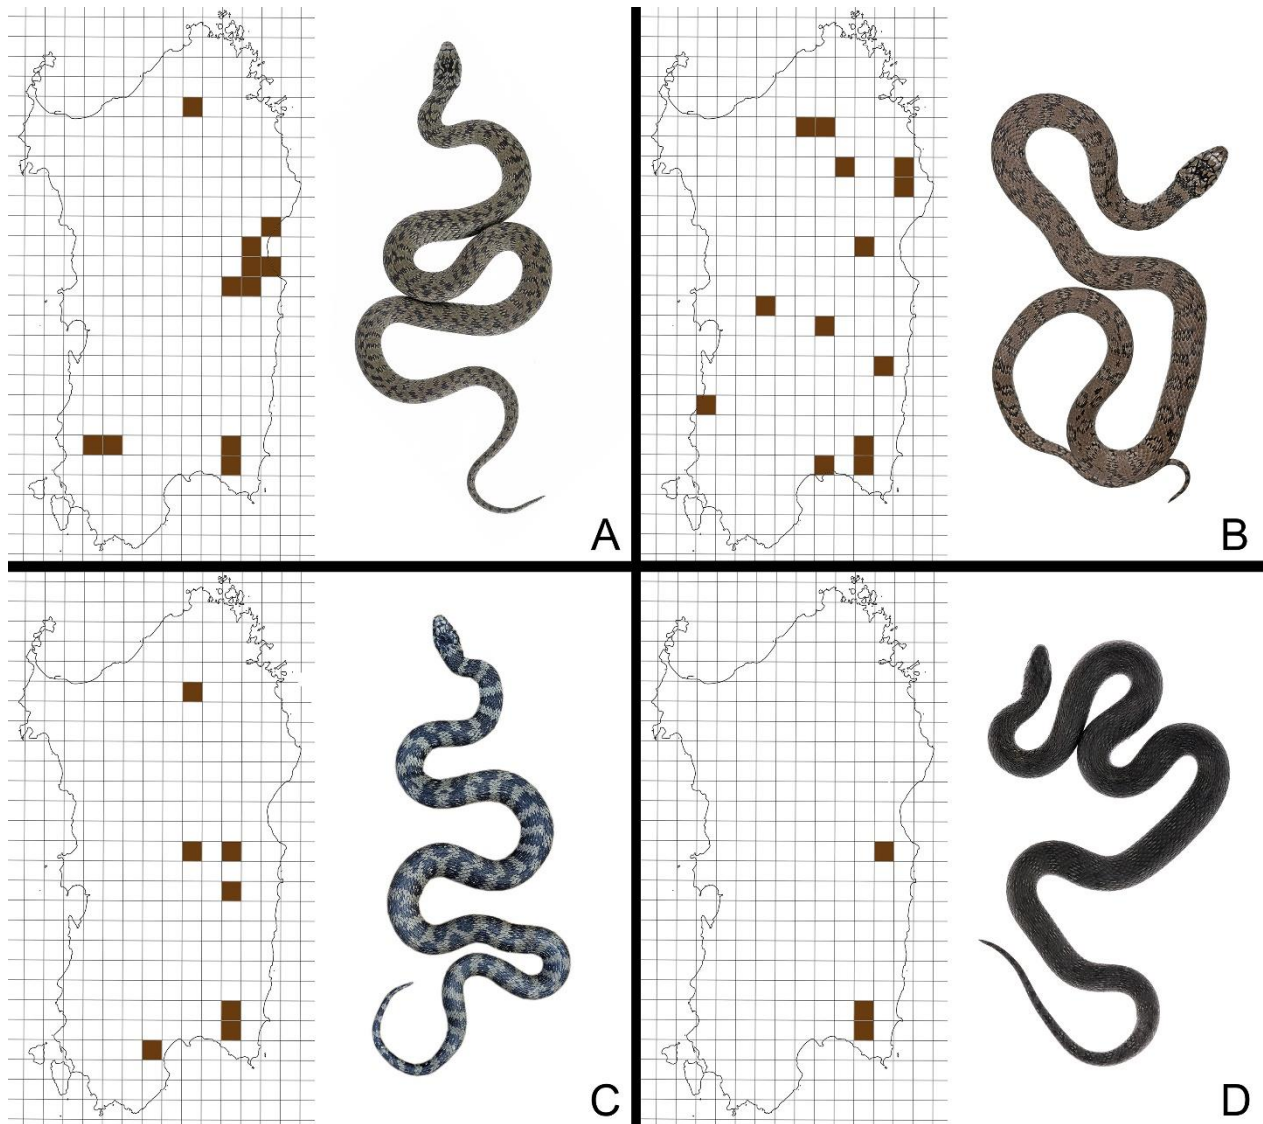

**Figure S8.** Distribution of the four different *Natrix helvetica cetti* dorsal patterns in the 10x10 km UTM map of Sardinia: category I (A), category II (B), category III (C) and category IV (D).
